# Supplementary material for: A Novel Strategy Facilitates Reference Gene Selection by RT-qPCR Analysis in Kidney Yang Deficiency Syndrome Mice Infected with the Influenza A (H1N1) Virus
Source: Biomed Res Int. 2020 Apr 25;2020:9075165. doi: 10.1155/2020/9075165 (PMC7201461; doi:10.1155/2020/9075165)
Supplement: Supplementary Materials — Gapdh description: these are RT-qPCR raw data of Gapdh genes. The normal group and the KYDS model group both have good melt peak curves, but they have obvious differences in Ct values more than two times. The Ct values of Gapdh description: these are Ct values of Gapdh genes. The average of Ct values in the normal group is 21.90; the average of Ct values in the model group is 19.89. The difference value between the two groups is 2.02. The Ct values of 5 reference gene description: this excel file includes Ct values of the normal and model groups from 5 reference genes (Gusb, Gapdh, Actb, β2m, and Tuba). They were analyzed with statistical method by Student's t-test; all the paired groups have a significant difference (P < 0.01). [file 9075165.f1.xlsx]

## Sheet: Sheet1
	Gapdh
	No.	Normal(Ct)	Model(Ct)
	1	21.97	20.13
	2	21.88	19
	3	21.84	21.25
	4	21.48	19.62
	5	22.35	19.79
	6		19.9
	7		20.15
	8		19.07
	9		20.07
Average		21.904	19.8867
Difference value			2.01733
